1 **Research Article**

2 **Title Page**

3 **Selective role of the translin/trax RNase complex in**  
4 **hippocampal synaptic plasticity**

5 **Alan Jung Park<sup>1,5#</sup>, Mahesh Shivarama Shetty<sup>2,3</sup>, Jay M. Baraban<sup>4</sup>, and Ted**  
6 **Abel<sup>1,2\*,3\*#</sup>**

7 <sup>1</sup>Department of Biology, University of Pennsylvania, Philadelphia, Pennsylvania

8 <sup>2</sup>Department of Neuroscience and Pharmacology, Carver College of Medicine,  
9 University of Iowa, Iowa City, Iowa, United States

10 <sup>3</sup>Iowa Neuroscience Institute, Carver College of Medicine, University of Iowa, Iowa City,  
11 Iowa, United States

12 <sup>4</sup>The Solomon H. Snyder Department of Neuroscience, Johns Hopkins University  
13 School of Medicine, Baltimore, Maryland, United States

14 <sup>5</sup>Current address: Mortimer B. Zuckerman Mind Brain Behavior Institute, Columbia  
15 University, New York, United States

16 \*Current address

17 #corresponding authors

18

19 **Addresses for Correspondence:**

20 **1)** Ted Abel, Iowa Neuroscience Institute, Department of Neuroscience and  
21 Pharmacology, Carver College of Medicine, University of Iowa, 2312 Pappajohn  
22 Biomedical Discovery Building, 169 Newton Road, Iowa City, Iowa 52242-1903,  
23 USA.

24 Phone: +1-(319) 383-4534

25 Email: [ted-abel@uiowa.edu](mailto:ted-abel@uiowa.edu).

26 **2)** Alan Jung Park, Gogos Lab, Columbia University, Mortimer B. Zuckerman Mind  
27 Brain Behavior Institute, Jerome L. Greene Science Center, L5-053, 3227  
28 Broadway, New York, NY 10027, USA.

29 Phone: +1-(646) 774-7116

30 Email: [alanjpark2014@gmail.com](mailto:alanjpark2014@gmail.com)

31

32 **Running Title:** Translin and synaptic plasticity

33 **Total number of pages:** 22

34 **Total number of words in the abstract:** 179

35 **Number of figures:** 4

36 **Number of tables:** 0

37

38

39 **Abstract**

40 Activity-dependent local protein synthesis is critical for synapse-specific, persistent  
41 plasticity. Abnormalities in local protein synthesis have been implicated in psychiatric  
42 disorders. We have recently identified the translin/trax microRNA-degrading enzyme as  
43 a novel mediator of protein synthesis at activated synapses. Additionally, mice lacking  
44 translin/trax exhibit some of the behavioral abnormalities found in a mouse model of  
45 fragile X syndrome. Therefore, identifying signaling pathways interacting with  
46 translin/trax to support persistent synaptic plasticity is a translationally relevant goal.  
47 Here, as a first step to achieve this goal, we have assessed the requirement of  
48 translin/trax for multiple hippocampal synaptic plasticity paradigms that rely on distinct  
49 molecular mechanisms. We found that mice lacking translin/trax exhibited selective  
50 impairment in a form of persistent hippocampal plasticity, which requires postsynaptic  
51 PKA activity. In contrast, enduring forms of plasticity that are dependent on presynaptic  
52 PKA were unaffected. Furthermore, these mice did not display  
53 exaggerated metabotropic glutamate receptor-mediated long-term synaptic depression,  
54 a hallmark of the mouse model of fragile X syndrome. Taken together, these findings  
55 demonstrate that translin/trax mediates long-term synaptic plasticity that is dependent  
56 on postsynaptic PKA signaling.

57

58 **Key words:** Translin, trax, long-term potentiation, long-term depression, local protein  
59 synthesis, hippocampal synaptic plasticity, FMRP, RNA-binding protein, microRNA

60

61

62

63

## 64 **Introduction**

65 Extensive evidence suggests that localization of key mRNAs in the vicinity of synapses  
66 and activity-mediated regulation of their translation contributes to persistent forms of  
67 synaptic plasticity related to long-term memory (1-4). This synapse-specific, activity-  
68 dependent mechanism requires precisely regulated molecular signaling in presynaptic  
69 or postsynaptic compartments (2, 3, 5). Several RNA-binding proteins (RBPs) take part  
70 in the trafficking and translational regulation of specific mRNAs and thus allowing  
71 diversity in the mechanisms engaged by different forms of plasticity (6-8). The RNA-  
72 binding protein translin is an evolutionarily conserved brain-enriched protein, which  
73 regulates RNA trafficking and translational control (9-12). Together with its partner  
74 protein, translin-associated factor X (trax), these proteins form a microRNA-degrading  
75 enzyme that can trigger protein synthesis by reversing microRNA-mediated silencing  
76 (13-15). We have previously shown that the translin/trax RNase complex mediates  
77 activity-dependent local synaptic protein synthesis required for input-specific  
78 heterosynaptic plasticity (synaptic tagging and capture) and memory formation (15).  
79 However, the mechanisms that regulate translin/trax activity within synaptic  
80 compartments have not been investigated.

81 Our previous findings suggest that translin/trax may interact with the cAMP-PKA  
82 signaling pathway. Specifically, the microRNA targets of translin/trax are predicted to  
83 regulate the expression of PKA-anchoring proteins, cAMP-degrading  
84 phosphodiesterases (PDEs), cAMP-producing Gs-coupled  $\beta$ 2-adrenergic receptors and  
85 adenylyl cyclases (15). In fact, the cAMP-PKA signaling pathway is highly localized  
86 within presynaptic or postsynaptic compartments by PKA-anchoring proteins and

## Translin and synaptic plasticity

87 mediates protein synthesis required for persistent synaptic plasticity and memory  
88 formation (16-20). Therefore, investigating whether translin/trax interacts with PKA  
89 signaling within presynaptic or postsynaptic compartments can provide clues to  
90 understanding molecular mechanisms linking translin/trax to synaptic plasticity and  
91 memory formation.

92 In the present study, we determined the role of translin/trax in distinct forms of synaptic  
93 plasticity, which require presynaptic or postsynaptic PKA signaling. As trax protein is  
94 unstable in the absence of translin, in the current study we used translin KO mice, which  
95 lack both translin and trax proteins (15, 21).

96

## 97 **Materials and Methods**

98 All experiments were performed according to the National Institutes of Health guidelines  
99 and were fully approved by the Institutional Animal Care and Use Committee at the  
100 University of Pennsylvania.

### 101 *Translin knockout (KO) mice*

102 The generation and maintenance of translin KO mice (MGI:2677496) were described  
103 previously (21, 22). Mice were backcrossed to C57BL/6J for more than 15 generations.  
104 Heterozygous male and heterozygous female mice were mated to produce homozygous  
105 translin KO mice and wildtype littermates. Mice were maintained on a 12h light/12h dark  
106 cycle with lights on at 8 am (ZT0). Food and water were available *ad libitum*. All  
107 experiments were performed during the light cycle using translin KO mice and wildtype

## Translin and synaptic plasticity

108 littermates as controls. 2- to 5-month-old mice were used for all experiments except for  
109 the LTD experiments in which 4- to 6-week-old mice were used.

110

### 111 *Drugs*

112 Forskolin (FSK, Molecular grade, Sigma), an adenylyl cyclase activator, was freshly  
113 prepared as a 50 mM solution in 100% ethanol and delivered at 50  $\mu$ M final  
114 concentration in artificial cerebrospinal fluid (aCSF) as described before {Park, 2014  
115 #22}. (*RS*)-3,5-Dihydroxyphenylglycine (DHPG, Tocris), a potent agonist of group I  
116 metabotropic glutamate receptors (mGluRs), was freshly prepared as a 10 mM solution  
117 in milliQ water and delivered at 100  $\mu$ M final concentration in aCSF as previously  
118 described (23).

119

### 120 *Electrophysiology*

121 Experiments were performed as described (15). Briefly, both male and female 2-5-  
122 month-old mice were sacrificed by cervical dislocation and hippocampi were quickly  
123 collected in chilled, oxygenated aCSF (124 mM NaCl, 4.4 mM KCl, 1.3 mM  
124 MgSO<sub>4</sub>·7H<sub>2</sub>O, 1 mM NaH<sub>2</sub>PO<sub>4</sub>·H<sub>2</sub>O, 26.2 mM NaHCO<sub>3</sub>, 2.5 mM CaCl<sub>2</sub>·2H<sub>2</sub>O and 10 mM  
125 D-glucose) bubbled with 95% O<sub>2</sub> / 5% CO<sub>2</sub>. 400  $\mu$ m-thick transverse hippocampal slices  
126 were prepared using a manual slicer (Stoelting) and placed in an interface recording  
127 chamber at 28°C (Fine Science Tools, Foster City, CA). The slices were constantly  
128 perfused with aCSF at 1 ml/min (or 2.5 ml/min for the mGluR-LTD experiment). Slices  
129 were equilibrated for at least 2 hours in aCSF. The stimulus intensity was set to elicit  
130 ~40% of the maximum field-EPSP amplitude determined by an input-output curve in

## Translin and synaptic plasticity

131 each experiment. The first 20-min baseline values were averaged, and the average was  
132 used to normalize each initial fEPSP slope. The input–output relationship and paired-  
133 pulse facilitation (PPF) were measured as previously described {Park, 2017 #46}. To  
134 electrically induce long-term potentiation (LTP), spaced 4-train (four 1 s 100 Hz trains  
135 delivered 5 minutes apart), massed 4-train (four 1 s 100 Hz trains delivered 5 seconds  
136 apart), theta-burst stimulation (TBS, 15 bursts of four 100 Hz pulses delivered for a total  
137 of 3 s at 5 Hz), and one-train (one 1 s 100 Hz train) stimulation were delivered after 20  
138 min baseline recordings. To chemically induce LTP, 50  $\mu$ M of FSK in aCSF was bath  
139 applied to the slices for 15 minutes following 20-min baseline recordings. To chemically  
140 induce LTD, 100  $\mu$ M of DHPG in aCSF was bath applied to the slices for 10 minutes  
141 following 20-min baseline recordings.

142

### 143 *Western blotting*

144 Hippocampal tissue homogenization, protein separation and transfer to polyvinylidene  
145 difluoride (PVDF) membranes were performed as previously described (24).  
146 Membranes were blocked in 5% BSA or 5% non-fat milk in TBST and incubated with  
147 primary antibodies (translin, 1:100,000; FMRP, 1:10,000, Millipore) overnight at 4°C.  
148 They were washed and incubated with appropriate horseradish peroxidase-conjugated  
149 goat anti-mouse or anti-rabbit IgG (1:10,000, Santa Cruz) for 1 h in room temperature.  
150 Blots were exposed on a film by ECL and quantified using ImageJ. The density of signal  
151 was normalized to beta-tubulin levels (1:50,000, Sigma). Translin antibody was  
152 produced (New England Peptide, Inc.) based on the sequences provided previously

153 (25). The antibody synthesis was based on the C-terminal sequence of the human  
154 translin (CKYDLSIRGFNKETA).

155  
156 *Data Analysis*  
157 Data analyses were performed using Statistica 10. The maintenance of LTP or LTD was  
158 analyzed using a two-way repeated-measures ANOVA test on the last 20-min of the  
159 recordings {Park, 2014 #22; Park, 2017 #46}. The average of the normalized slopes over  
160 the last 20-min was compared between two groups using unpaired t-test. Western  
161 blotting data was analyzed using unpaired t-test. The 'n' used in all the experiments  
162 represents the number of mice. Differences were considered statistically significant  
163 when  $p < 0.05$ . Data are plotted as mean  $\pm$  S.E.M.

164  
165 **Results**

166 **Translin KO mice show deficits in a specific form of PKA-dependent long-lasting**  
167 **LTP**

168 In our previous study, we found that translin knockout mice display normal basal  
169 synaptic transmission measured by paired-pulse facilitation and input-output curves.  
170 These mice also exhibit unaltered transient potentiation, induced by a single 100 Hz  
171 stimulation, that requires neither PKA activity nor protein synthesis (15). In the present  
172 study, we first tested long-lasting forms of LTP induced by spaced 4-train (four 100 Hz  
173 trains of 1 s each, delivered 5 minutes apart) or massed 4-train (four 100 Hz trains of 1  
174 s each, delivered 5 s apart) stimulation. The latter does not depend on PKA activation,  
175 whereas the former requires postsynaptic PKA activity (26-30). Hippocampal slices from



## Translin and synaptic plasticity

176 translin KO mice showed marked impairment in spaced 4-train LTP (**Fig. 1B**;  $n = 5$  for  
177 each group, two-way repeated-measures ANOVA,  $F_{(1,8)} = 34.43$ ,  $p = 0.00038$ ). The  
178 average of the initial fEPSP slope over the last 20 min of the recordings was reduced in  
179 slices from translin KO mice compared to slices from wildtype littermates (wildtype  
180 littermates:  $176.6 \pm 13.5\%$ ,  $n = 5$ ; translin KO mice:  $89.5 \pm 9.6\%$ ,  $n = 5$ , t-test,  $p =$   
181  $0.00037$ ). On the other hand, massed 4-train LTP was unaltered in slices from translin  
182 KO mice as shown in **Fig. 1C** ( $n = 5$  for translin KO mice,  $n = 5$  for wildtype littermates,  
183 two-way repeated-measures ANOVA,  $F_{(1,8)} = 0.923$ ,  $p = 0.365$ ). The average of the  
184 initial fEPSP slope over the last 20 min of the recordings was similar between slices  
185 from translin KO mice and wildtype littermates (wildtype littermates:  $143.6 \pm 8.2\%$ ,  $n = 5$ ;  
186 translin KO mice:  $154.6 \pm 9.9\%$ ,  $n = 5$ , t-test,  $p = 0.364$ ).

187  
188 Next, we examined two other long-lasting forms of LTP induced by either theta-burst  
189 stimulation (TBS; 15 bursts of four 100 Hz pulses delivered at 5 Hz) or bath application  
190 of the adenylyl cyclase activator forskolin (FSK). These forms of LTP rely on increased  
191 transmitter release and require presynaptically compartmentalized PKA signaling (19,  
192 28, 31-33). TBS-LTP was unaffected in slices from translin KO mice (**Fig. 2A**;  $n = 5$  for  
193 each group, two-way repeated-measures ANOVA,  $F_{(1,8)} = 0.007$ ,  $p = 0.94$ ). The average  
194 of the initial fEPSP slope over the last 20 min of the recordings was similar between  
195 slices from translin KO mice and wildtype littermates (wildtype littermates:  $150.03 \pm$   
196  $7.8\%$ ,  $n = 5$ ; translin KO mice:  $151.2 \pm 13.4\%$ ,  $n = 5$ , t-test,  $p = 0.936$ ). Furthermore,  
197 slices from translin KO mice showed no impairment in the FSK-LTP compared to the  
198 WT mice (**Fig. 2B**;  $n = 5$  for translin KO mice,  $n = 6$  for wildtype littermates, two-way

## Translin and synaptic plasticity

199 repeated-measures ANOVA,  $F_{(1,9)} = 0.07$ ,  $p = 0.79$ ). The average of the initial fEPSP  
200 slope over the last 20 min of the recordings was comparable between slices from  
201 translin KO mice and wildtype littermates (wildtype littermates:  $180 \pm 14.3\%$ ,  $n = 6$ ;  
202 translin KO mice:  $180.4 \pm 11.8\%$ ,  $n = 5$ , t-test,  $p = 0.982$ ).

203  
204 Taken together, these data suggest that translin is selectively involved in mediating the  
205 long-lasting form of LTP induced by spaced tetanic stimuli, but not in LTP induced by  
206 massed stimuli, TBS or forskolin.

207  
208 **Translin KO mice exhibit unaltered mGluR-LTD and protein levels of hippocampal**

### 209 **FMRP**

210 One of the most well-studied RBPs is fragile X mental retardation protein (FMRP).  
211 Exaggerated metabotropic glutamate receptor-mediated LTD (mGluR-LTD) is a well  
212 characterized phenotype of FMRP KO mice and has been proposed as an underlying  
213 mechanism of fragile X syndrome (34-36). Because both translin/trax and FMRP  
214 mediate local protein synthesis (15, 36), we tested mGluR-LTD in hippocampal slices  
215 from translin KO mice. In contrast to the findings from FMRP KO mice, mGluR-LTD was  
216 unaffected in slices from translin KO mice (**Fig. 3A**;  $n = 5$  for each group, two-way  
217 repeated measures ANOVA,  $F_{(1,8)} = 0.08$ ,  $p = 0.79$ ). The average of the initial fEPSP  
218 slope over the last 20 min of the recordings was comparable between slices from  
219 translin KO mice and wildtype littermates (wildtype littermates:  $75.9 \pm 3.2\%$ ,  $n = 5$ ;  
220 translin KO mice:  $78.9 \pm 3.1\%$ ,  $n = 5$ , t-test,  $p = 0.473$ ). We reasoned that if translin and  
221 FMRP are functionally independent, loss of translin/trax should not cause a

222 compensatory increase in FMRP protein levels. Indeed, Western blot analyses showed  
223 no changes in the protein levels of hippocampal FMRP in translin KO mice relative to  
224 wildtype littermates (**Fig. 3B**; translin KO mice:  $102.5 \pm 0.4\%$ ,  $n = 6$ ; wildtype littermates:  
225  $100 \pm 4.3\%$ ,  $n = 6$ , t-test,  $p = 0.36$ ). Our data indicate that translin/trax and FMRP play  
226 distinct roles in hippocampal synaptic plasticity.

227

## 228 **Discussion**

229 The translin/trax complex is implicated in neuropsychiatric disorders (37). However, the  
230 role of translin/trax in synaptic plasticity is largely unknown. In a previous report (15),  
231 we provided the first evidence that translin/trax mediates activity-dependent synaptic  
232 translation that is critical for synaptic tagging and capture, a form of heterosynaptic  
233 associative plasticity (38, 39), and long-term memory. The present study further  
234 determined that translin/trax is selectively required for spaced tetani-induced LTP, a  
235 long-lasting form of hippocampal synaptic plasticity that is mediated by postsynaptic  
236 PKA activity.

237

238 We found that translin/trax is required for spaced 4-train-LTP that relies on postsynaptic  
239 PKA activity (28) but dispensable for TBS- and FSK-LTP that rely on presynaptic PKA  
240 activity (19, 28). These findings highlight the role of translin/trax in postsynaptic PKA  
241 signaling-dependent persistent synaptic plasticity. Notably, synaptic tagging and capture  
242 is impaired in the absence of translin/trax (15) but is intact when postsynaptically  
243 compartmentalized PKA signaling is disrupted (19). However, these studies used  
244 massed 4-train-LTP, which does not rely on PKA signaling, to induce synaptic tagging

## Translin and synaptic plasticity

245 and capture. Considering this experimental caveat, multi-disciplinary approaches to  
246 manipulate localized translin/trax-PKA signaling with high spatiotemporal specification  
247 will further dissect the role of translin/trax in postsynaptic PKA signaling-mediated  
248 persistent synaptic plasticity.

249  
250 We found that mice lacking translin/trax display electrophysiological phenotypes that are  
251 distinct from those observed in mice lacking FMRP, regardless of sharing some  
252 common behavioral abnormalities (22). Translin KO mice show deficits in spaced 4-train  
253 LTP (**Fig.1B**) and high-frequency stimulation-induced synaptic tagging and capture (15),  
254 but FMRP KO mice do not exhibit these impairments (36, 40). Exaggerated mGluR-LTD  
255 is the prominent phenotype of FMRP KO mice (35), but it was not observed in translin  
256 KO mice (**Fig. 3A**). Thus, our study demonstrates a selective role for translin/trax in  
257 synaptic plasticity and provides a foundation for future studies defining signaling  
258 pathways that enable synaptic stimulation to trigger the activation of this microRNA-  
259 degrading enzyme.

260  
261 Based on our published and current findings, we propose a working model in which  
262 translin/trax mediates persistent synaptic plasticity (**Fig.4**). During basal synaptic  
263 transmission (**Fig.4A**), the translin/trax microRNA-degrading enzyme is localized within  
264 the processing bodies (P-bodies) with its RNase inactive. This is supported by our  
265 previous data showing colocalization of trax with the P-body marker GW182 in  
266 hippocampal primary neuron dendrites (15). Given that P-bodies also contain mRNAs  
267 translationally repressed by the microRNA-mediated silencing complex (miRISC) (41-

## Translin and synaptic plasticity

268 43), the translin/trax complex is well-positioned to degrade microRNAs. Based on our  
269 preliminary data (not shown) suggesting the interaction of translin and a PKA-anchoring  
270 protein in hippocampal tissue, it is possible that PKA-anchoring proteins might tether  
271 translin/trax complex and PKA within P-bodies in postsynaptic compartments. Following  
272 persistent plasticity-inducing stimuli or learning (**Fig.4B**), P-bodies are translocated to  
273 dendritic spines (44), and localized pools of PKA and the translin/trax complex are  
274 activated. Active translin/trax RNase then degrades microRNAs, relieving transcripts  
275 from translational repression. This allows the production of key plasticity-related  
276 proteins required for persistent plasticity. We have previously identified activin receptor  
277 type IC (ACVR1C) as one such plasticity-related protein (15). Whether PKA directly  
278 activates the translin/trax complex or acts through other targets warrants further  
279 investigation.

280  
281 Taken together, these findings expand our understanding of the role of translin/trax in  
282 persistent synaptic plasticity. Future investigations are needed to directly validate the  
283 proposed model. First, the compartment-specific function of translin/trax needs to be  
284 further validated using hippocampal subregion-specific deletion of translin/trax using  
285 Cre-dependent viral strategies. Second, experiments are also needed to validate the  
286 dynamics of translin/trax localization in P-bodies following plasticity-inducing stimuli.  
287 Tagging a fluorescent reporter to translin or trax would enable tracking the localization  
288 of translin/trax but achieving this without affecting molecular interactions and RNase  
289 activity is challenging. Lastly, molecular assays to determine mechanisms by which  
290 translin/trax interacts with localized PKA signaling will be required. Given the role of

291 translin/trax in synaptic memory mechanisms, our findings pave the way for future  
292 research aimed at elucidating the pathophysiology of neuropsychiatric disorders.

293

294 **List of abbreviations:**

295 aCSF – artificial cerebrospinal fluid

296 AC – adenylyl cyclase

297 ACVR1C - activin receptor type 1-C

298 AMPAR -  $\alpha$ -amino-3-hydroxy-5-methyl-4-isoxazolepropionic acid receptor

299 CaM - calmodulin

300 cAMP - cyclic adenosine monophosphate

301 DHPG - (*RS*)-3,5-Dihydroxyphenylglycine

302 fEPSP – field excitatory postsynaptic potential

303 FMRP - fragile X mental retardation protein

304 FSK – forskolin

305 GPCR – G-protein coupled receptor

306 LTP – long-term potentiation

307 LTD – long-term depression

308 mGluR – metabotropic glutamate receptor

309 miRISC – microRNA-induced silencing complex

310 NMDAR – N-methyl D-aspartate receptor

311 PDE - phosphodiesterase

312 PKA – protein kinase A

313 RBP – RNA-binding protein

314 RNase - ribonuclease  
315 TBS – theta-burst stimulation  
316 TN/TX – translin/trax  
317 Trax – translin-associated protein-X

318  
319  
320

321 **Declarations:**

322 **1. Ethics approval:** All the experiments presented here were performed using  
323 mice. All experiments were performed according to the National Institutes of  
324 Health guidelines and were fully approved by the Institutional Animal Care and  
325 Use Committee at the University of Pennsylvania.

326 **2. Consent for publication:** Not applicable

327 **3. Availability of data and materials:** All the data supporting the conclusions of  
328 this article are included within the manuscript. Original data files and any  
329 supporting materials are available upon request, from the corresponding authors.

330 **4. Competing interests:** The authors declare that they have no competing  
331 interests.

332 **5. Funding:** The study was supported by funding from NIH RO1 MH 087463 (Abel,  
333 T.).

334 **6. Authors' contributions:** A.J.P and T.A designed the experiments. A.J.P  
335 performed the electrophysiology and western blotting experiments. A.J.P  
336 performed data analysis. A.J.P and M.S.S prepared figures and wrote the

337 manuscript with inputs from J.M.B and T.A. All the listed authors have read and  
338 approved the manuscript for publication.

339 **7. Acknowledgements:** Not applicable

340

341

342

343

344

345 **Figure legends:**

346

347 **Figure 1. Translin KO mice exhibit deficits in a postsynaptic PKA-dependent form**  
348 **of long-lasting LTP.**

349 **A.** A schematic representation of a hippocampal slice showing the placement of  
350 electrodes for field-EPSP recordings in the CA1 stratum radiatum upon stimulation of  
351 Schaffer collaterals. **B.** Hippocampal slices from translin KO mice (n=5; 3 males, 2  
352 females) showed impaired long-lasting LTP induced by spaced 4-train stimulation (four  
353 1s 100 Hz stimuli delivered 5 minutes apart) compared to slices from wildtype  
354 littermates (n=5; 1 male, 4 females) (two-way repeated-measures ANOVA,  $F_{(1,8)} =$   
355  $34.43$ ,  $p = 0.00038$ ). **C.** Massed 4-train stimulation (four 1 s 100 Hz trains delivered 5  
356 seconds apart) elicited long-lasting LTP that was not significantly different between  
357 slices from translin KO mice (n=5; 2 males, 3 females) and wildtype littermates (n=5; 1  
358 male, 4 females) (two-way repeated-measures ANOVA,  $F_{(1,8)} = 0.923$ ,  $p = 0.365$ ).  
359 Representative traces before (black) and after (red) stimulation are shown on top of



360 each graph. Scale bars for traces 2 mV, 2 ms. 'n' refers to the number of mice used.

361 Error bars reflect S.E.M.

362

363 **Figure 2. Translin KO mice show no alterations in predominantly presynaptic**  
364 **forms of long-lasting LTP.**

365 **A.** Theta-burst stimulation (15 bursts of four 100 Hz pulses delivered at 5 Hz for a total  
366 of 3 s) induced similar levels of long-lasting LTP in slices from translin KO mice (n=5; 1  
367 male, 4 females) or wildtype littermates (n=5; 2 males, 3 females) (two-way repeated  
368 measures ANOVA,  $F_{(1,8)} = 0.007$ ,  $p = 0.94$ ). **B.** Slices from translin KO mice (n=5; all  
369 females) and wildtype littermates (n=6; 1 male, 5 females) displayed similar levels of  
370 forskolin (FSK)-induced long-lasting potentiation (two-way repeated-measures ANOVA,  
371  $F_{(1,9)} = 0.07$ ,  $p = 0.79$ ). Representative traces before (black) and after (red) stimulation  
372 are shown on top of each graph. Scale bars for traces 2 mV, 2 ms. 'n' refers to the  
373 number of mice used. Error bars reflect S.E.M.

374

375 **Figure 3. Translin KO mice show unaltered mGluR-LTD and unchanged**  
376 **hippocampal protein levels of FMRP.**

377 **A.** Hippocampal slices from translin KO mice (n=5; males) and wildtype littermates (n=5;  
378 all males) displayed similar mGluR-LTD induced by bath application of 100 mM of  
379 DHPG for 10 minutes (two-way repeated measures ANOVA,  $F_{(1,8)} = 0.08$ ,  $p = 0.79$ ).  
380 Representative traces before (black) and after (red) stimulation are shown on top of the  
381 graph. Scale bars for traces 2 mV, 5 ms. **B.** Hippocampal extracts from translin KO mice  
382 (n=6) and wildtype littermates (n=6) had similar protein levels of FMRP (t-test,  $p = 0.36$ ).

## Translin and synaptic plasticity

383 Beta-tubulin was used as the loading control and the expression level was normalized  
384 to the level of wildtype littermates. Representative blots are shown on top of the graph.  
385 'n' refers to the number of mice used. Error bars reflect S.E.M.

386

### 387 **Figure 4. A working model for the role of translin/trax RNase complex in** 388 **hippocampal synaptic plasticity**

389 **(A)** During basal synaptic transmission, the inactive translin/trax (TN/TX) RNase  
390 complex localizes to the discrete ribonucleoprotein foci called Processing body (P-body)  
391 in the postsynaptic dendrites. P-bodies also contain the microRNA-induced silencing  
392 complex (miRISC) formed by the microRNAs and other associated protein factors that  
393 bind to the mRNA transcripts and repress their translation. **(B)** Synaptic activity that  
394 induces persistent plasticity leads to NMDAR-mediated  $Ca^{2+}$  entry and GPCR activation  
395 by modulatory neurotransmitters (e.g. norepinephrine and dopamine). This results in  
396 adenylyl cyclase activation, rise in cAMP levels and PKA activation in the postsynaptic  
397 compartment. Synaptic activity also leads to dynamic changes in P-bodies causing  
398 them to localize in the vicinity of active dendritic spines. Active PKA subsequently  
399 results in activation of the translin/trax RNase in the P-bodies, either directly or through  
400 other targets. Once active, the translin/trax RNase degrades microRNAs bound to the  
401 mRNA transcripts, thus reversing the translational silencing. The released mRNAs are  
402 then translated by the polyribosomes leading to the synthesis of key plasticity-related  
403 proteins required for long-lasting LTP.

404

405 **References:**

## Translin and synaptic plasticity

- 406 1. Buffington SA, Huang W, Costa-Mattioli M. Translational Control in Synaptic  
407 Plasticity and Cognitive Dysfunction. *Annual Review of Neuroscience*. 2014;37(1):17-  
408 38.
- 409 2. Martin KC, Barad M, Kandel ER. Local protein synthesis and its role in synapse-  
410 specific plasticity. *Curr Opin Neurobiol*. 2000;10(5):587-92.
- 411 3. Sutton MA, Schuman EM. Dendritic Protein Synthesis, Synaptic Plasticity, and  
412 Memory. *Cell*. 2006;127(1):49-58.
- 413 4. Oswald Steward JD, Shannon Farris. Local Protein Synthesis at Synapses. In:  
414 Virginia Pickel MS, editor. *The Synapse: Structure and Function*: Academic Press;  
415 2014. p. 173-4.
- 416 5. Hafner AS, Donlin-Asp PG, Leitch B, Herzog E, Schuman EM. Local protein  
417 synthesis is a ubiquitous feature of neuronal pre- and postsynaptic compartments.  
418 *Science*. 2019;364(6441).
- 419 6. Fernandez-Moya SM, Bauer KE, Kiebler MA. Meet the players: local translation  
420 at the synapse. *Frontiers in Molecular Neuroscience*. 2014;7.
- 421 7. Thelen MP, Kye MJ. The Role of RNA Binding Proteins for Local mRNA  
422 Translation: Implications in Neurological Disorders. *Frontiers in Molecular Biosciences*.  
423 2020;6.
- 424 8. Ule J, Darnell RB. RNA binding proteins and the regulation of neuronal synaptic  
425 plasticity. *Curr Opin Neurobiol*. 2006;16(1):102-10.
- 426 9. Claußen M, Koch R, Jin Z-Y, Suter B. Functional Characterization of *Drosophila*  
427 Translin and Trax. *Genetics*. 2006;174(3):1337-47.
- 428 10. Fu X, Shah A, Baraban JM. Rapid reversal of translational silencing: Emerging  
429 role of microRNA degradation pathways in neuronal plasticity. *Neurobiology of Learning*  
430 *and Memory*. 2016;133:225-32.
- 431 11. Jaendling A, Ramsay. Biological roles of translin and translin-associated factor-X:  
432 RNA metabolism comes to the fore. *Biochemical Journal*. 2010;429(2):225-34.
- 433 12. Li Z, Wu Y, Baraban JM. The Translin/Trax RNA binding complex: Clues to  
434 function in the nervous system. *Biochimica et Biophysica Acta (BBA) - Gene Regulatory*  
435 *Mechanisms*. 2008;1779(8):479-85.

## Translin and synaptic plasticity

- 436 13. Asada K, Canestrari E, Fu X, Li Z, Makowski E, Wu YC, et al. Rescuing dicer  
437 defects via inhibition of an anti-dicing nuclease. *Cell Rep.* 2014;9(4):1471-81.
- 438 14. Baraban JM, Shah A, Fu X. Multiple Pathways Mediate MicroRNA Degradation:  
439 Focus on the Translin/Trax RNase Complex. *Adv Pharmacol.* 2018;82:1-20.
- 440 15. Park AJ, Havekes R, Fu X, Hansen R, Tudor JC, Peixoto L, et al. Learning  
441 induces the translin/trax RNase complex to express activin receptors for persistent  
442 memory. *Elife.* 2017;6.
- 443 16. Costa-Mattioli M, Sossin WS, Klann E, Sonenberg N. Translational Control of  
444 Long-Lasting Synaptic Plasticity and Memory. *Neuron.* 2009;61(1):10-26.
- 445 17. Dell'Acqua ML, Smith KE, Gorski JA, Horne EA, Gibson ES, Gomez LL.  
446 Regulation of neuronal PKA signaling through AKAP targeting dynamics. *European*  
447 *Journal of Cell Biology.* 2006;85(7):627-33.
- 448 18. Hernandez PJ, Abel T. The role of protein synthesis in memory consolidation:  
449 Progress amid decades of debate. *Neurobiology of Learning and Memory.*  
450 2008;89(3):293-311.
- 451 19. Park AJ, Havekes R, Choi JH, Luczak V, Nie T, Huang T, et al. A presynaptic  
452 role for PKA in synaptic tagging and memory. *Neurobiology of Learning and Memory.*  
453 2014;114:101-12.
- 454 20. Sanderson JL, Dell'Acqua ML. AKAP Signaling Complexes in Regulation of  
455 Excitatory Synaptic Plasticity. *The Neuroscientist.* 2011;17(3):321-36.
- 456 21. Chennathukuzhi V, Stein JM, Abel T, Donlon S, Yang S, Miller JP, et al. Mice  
457 deficient for testis-brain RNA-binding protein exhibit a coordinate loss of TRAX, reduced  
458 fertility, altered gene expression in the brain, and behavioral changes. *Mol Cell Biol.*  
459 2003;23(18):6419-34.
- 460 22. Stein JM, Bergman W, Fang Y, Davison L, Brensinger C, Robinson MB, et al.  
461 Behavioral and neurochemical alterations in mice lacking the RNA-binding protein  
462 translin. *J Neurosci.* 2006;26(8):2184-96.
- 463 23. Citri A, Soler-Llavina G, Bhattacharyya S, Malenka RC. N-methyl-D-aspartate  
464 receptor- and metabotropic glutamate receptor-dependent long-term depression are  
465 differentially regulated by the ubiquitin-proteasome system. *Eur J Neurosci.*  
466 2009;30(8):1443-50.

## Translin and synaptic plasticity

- 467 24. Vecsey CG, Peixoto L, Choi JH, Wimmer M, Jaganath D, Hernandez PJ, et al.  
468 Genomic analysis of sleep deprivation reveals translational regulation in the  
469 hippocampus. *Physiol Genomics*. 2012;44(20):981-91.
- 470 25. Finkenstadt PM, Kang WS, Jeon M, Taira E, Tang W, Baraban JM.  
471 Somatodendritic localization of Translin, a component of the Translin/Trax RNA binding  
472 complex. *J Neurochem*. 2000;75(4):1754-62.
- 473 26. Duffy SN, Nguyen PV. Postsynaptic application of a peptide inhibitor of cAMP-  
474 dependent protein kinase blocks expression of long-lasting synaptic potentiation in  
475 hippocampal neurons. *J Neurosci*. 2003;23(4):1142-50.
- 476 27. Kim M, Huang T, Abel T, Blackwell KT. Temporal sensitivity of protein kinase a  
477 activation in late-phase long term potentiation. *PLoS Comput Biol*. 2010;6(2):e1000691.
- 478 28. Nie T, McDonough CB, Huang T, Nguyen PV, Abel T. Genetic Disruption of  
479 Protein Kinase A Anchoring Reveals a Role for Compartmentalized Kinase Signaling in  
480 Theta-Burst Long-Term Potentiation and Spatial Memory. *Journal of Neuroscience*.  
481 2007;27(38):10278-88.
- 482 29. Scharf MT, Woo NH, Lattal KM, Young JZ, Nguyen PV, Abel T. Protein synthesis  
483 is required for the enhancement of long-term potentiation and long-term memory by  
484 spaced training. *J Neurophysiol*. 2002;87(6):2770-7.
- 485 30. Woo NH, Duffy SN, Abel T, Nguyen PV. Temporal spacing of synaptic  
486 stimulation critically modulates the dependence of LTP on cyclic AMP-dependent  
487 protein kinase. *Hippocampus*. 2003;13(2):293-300.
- 488 31. Bayazitov IT, Richardson RJ, Fricke RG, Zakharenko SS. Slow presynaptic and  
489 fast postsynaptic components of compound long-term potentiation. *J Neurosci*.  
490 2007;27(43):11510-21.
- 491 32. Chavez-Noriega LE, Stevens CF. Increased transmitter release at excitatory  
492 synapses produced by direct activation of adenylate cyclase in rat hippocampal slices. *J*  
493 *Neurosci*. 1994;14(1):310-7.
- 494 33. Trudeau LE, Emery DG, Haydon PG. Direct modulation of the secretory  
495 machinery underlies PKA-dependent synaptic facilitation in hippocampal neurons.  
496 *Neuron*. 1996;17(4):789-97.

## Translin and synaptic plasticity

- 497 34. Bear MF, Huber KM, Warren ST. The mGluR theory of fragile X mental  
498 retardation. *Trends Neurosci.* 2004;27(7):370-7.
- 499 35. Huber KM, Gallagher SM, Warren ST, Bear MF. Altered synaptic plasticity in a  
500 mouse model of fragile X mental retardation. *Proc Natl Acad Sci U S A.*  
501 2002;99(11):7746-50.
- 502 36. Sidorov MS, Auerbach BD, Bear MF. Fragile X mental retardation protein and  
503 synaptic plasticity. *Mol Brain.* 2013;6:15.
- 504 37. Weng YT, Chien T, Kuan, II, Chern Y. The TRAX, DISC1, and GSK3 complex in  
505 mental disorders and therapeutic interventions. *J Biomed Sci.* 2018;25(1):71.
- 506 38. Frey U, Morris RGM. Synaptic tagging and long-term potentiation. *Nature.*  
507 1997;385(6616):533-6.
- 508 39. Redondo RL, Morris RGM. Making memories last: the synaptic tagging and  
509 capture hypothesis. *Nature Reviews Neuroscience.* 2011;12(1):17-30.
- 510 40. Connor SA, Hoeffler CA, Klann E, Nguyen PV. Fragile X mental retardation  
511 protein regulates heterosynaptic plasticity in the hippocampus. *Learn Mem.*  
512 2011;18(4):207-20.
- 513 41. Chan SP, Slack FJ. microRNA-mediated silencing inside P-bodies. *RNA Biol.*  
514 2006;3(3):97-100.
- 515 42. Luo Y, Na Z, Slavoff SA. P-Bodies: Composition, Properties, and Functions.  
516 *Biochemistry.* 2018;57(17):2424-31.
- 517 43. Rajgor D, Hanley JG. The Ins and Outs of miRNA-Mediated Gene Silencing  
518 during Neuronal Synaptic Plasticity. *Noncoding RNA.* 2016;2(1).
- 519 44. Oh JY, Kwon A, Jo A, Kim H, Goo YS, Lee JA, et al. Activity-dependent synaptic  
520 localization of processing bodies and their role in dendritic structural plasticity. *J Cell*  
521 *Sci.* 2013;126(Pt 9):2114-23.

522

Figure 1.

**A**

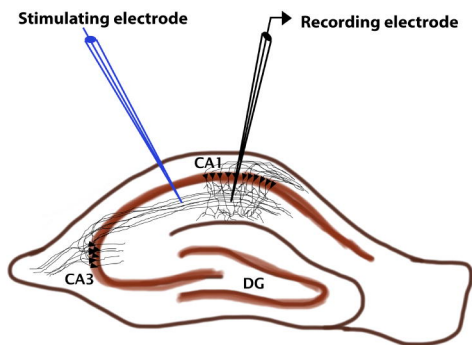

**B**

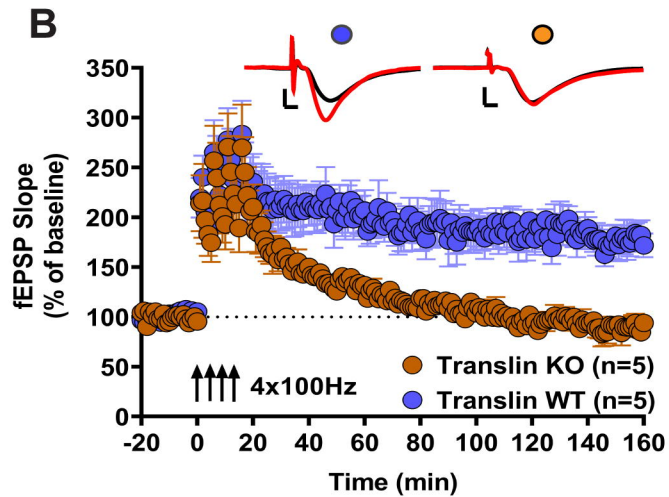

**C**

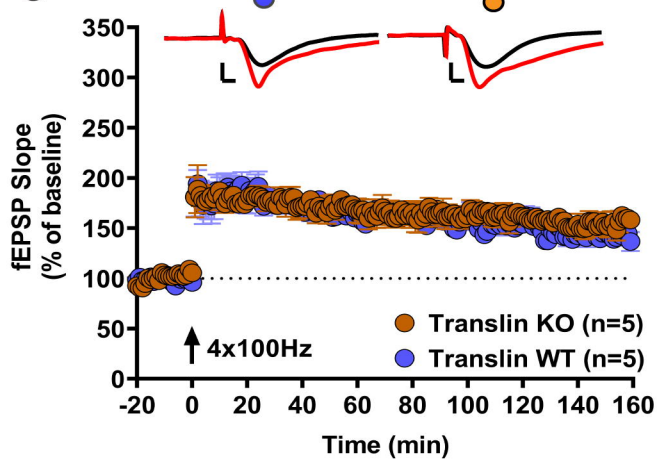

Figure 2.

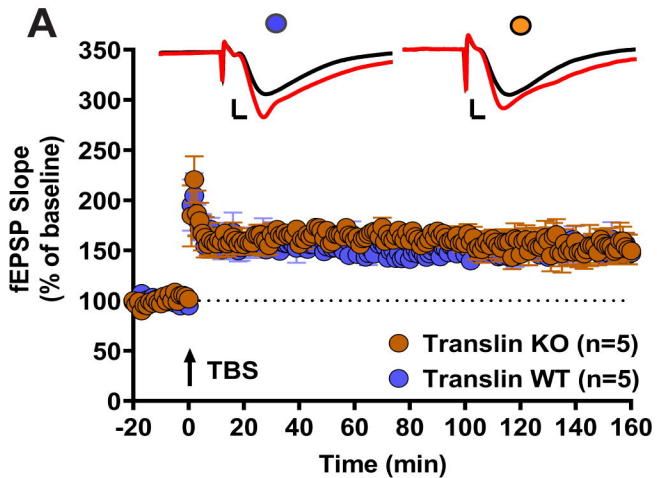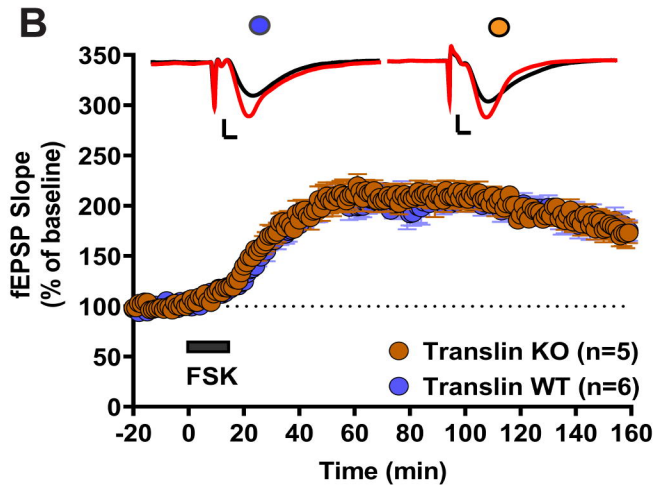



Figure 3.

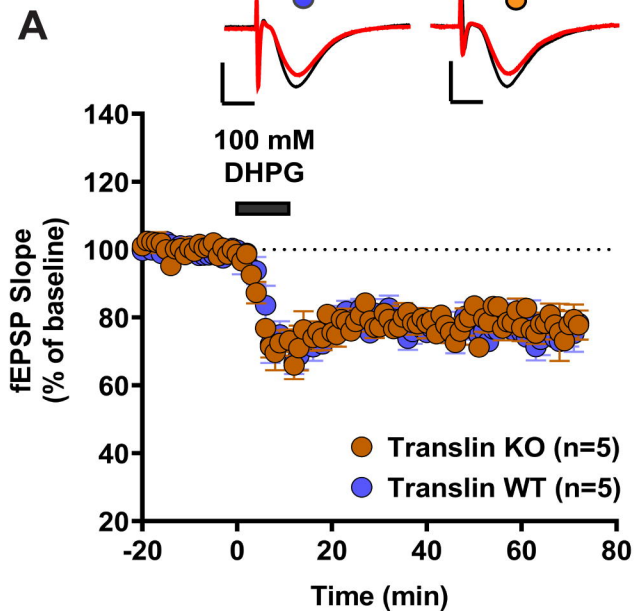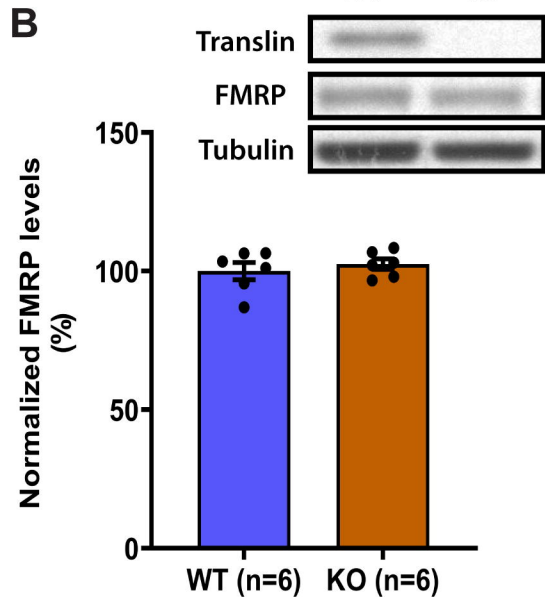

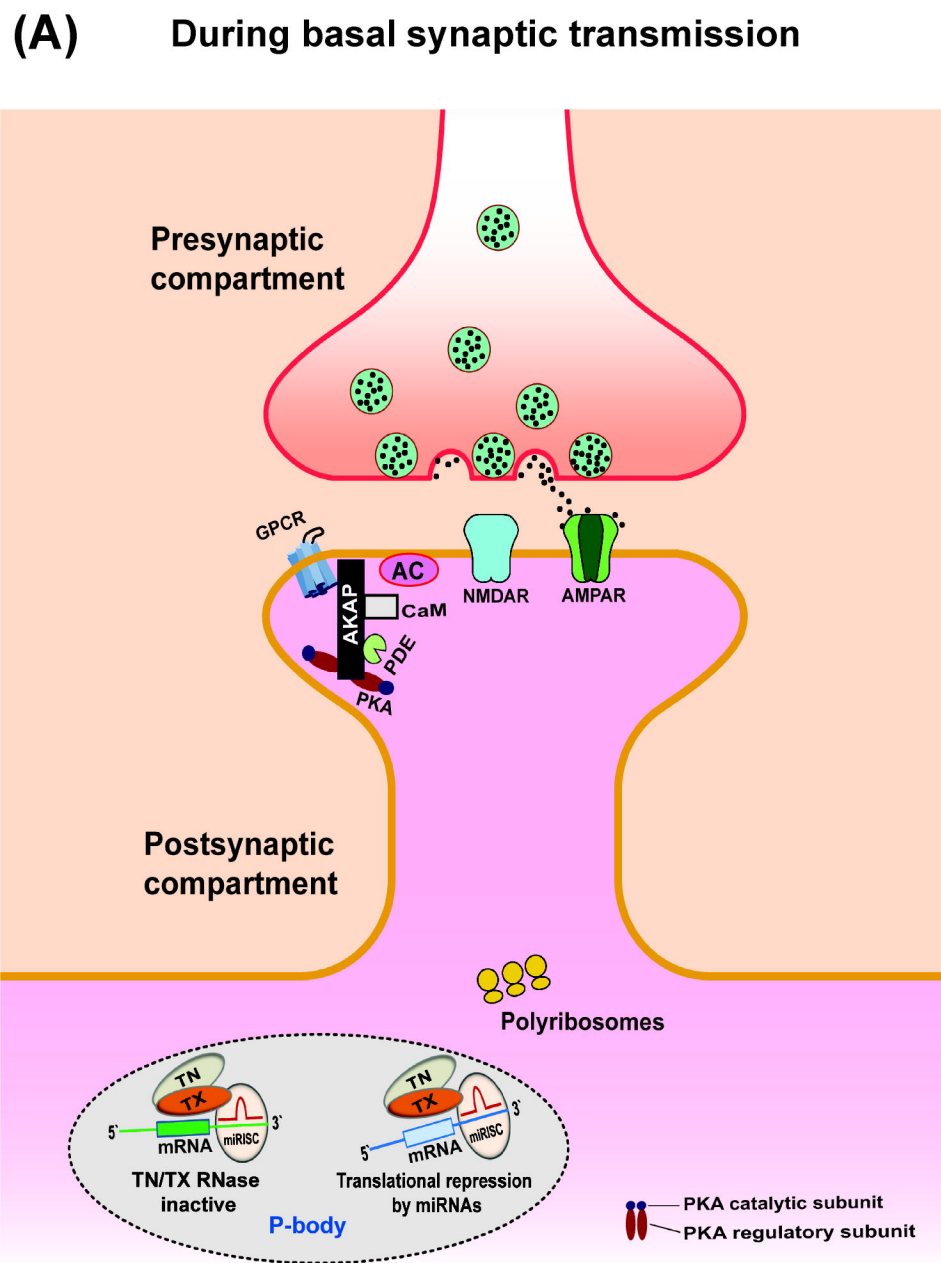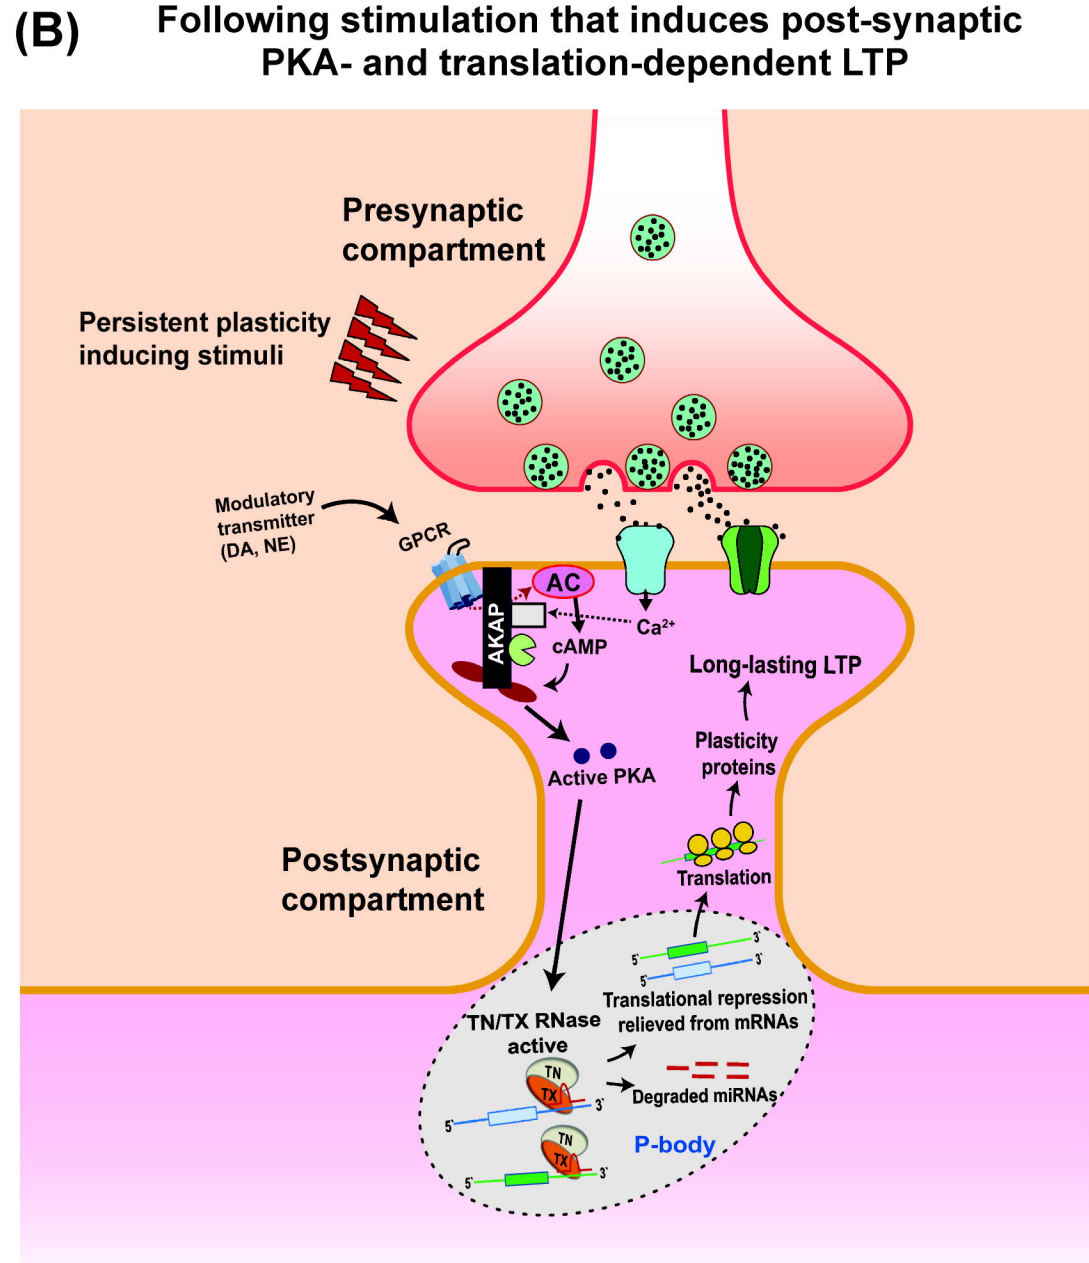

Source: https://www.biorxiv.org/content/10.1101/2020.05.19.105189v1.full.pdf
